# Supplementary material
Source: PubMed Central journal article supplement (PMC4083108)

1 **Supplemental Data: The intra viral protein interaction network of hepatitis C**  
2 **virus.**

3 Nicole Hagen<sup>2,\*</sup>, Karen Bayer<sup>1,\*</sup>, Kathrin Rösch<sup>2</sup>, Michael Schindler<sup>1,2,3,#</sup>

4 <sup>1</sup>Institute of Virology, Helmholtz Zentrum Munich, German Research Center for  
5 Environmental Health, Munich, Germany

6 <sup>2</sup>Heinrich Pette Institute, Leibniz Institute for Experimental Virology, Hamburg,  
7 Germany

8 <sup>3</sup>Institute of Medical Virology and Epidemiology of Viral Diseases, University Clinic  
9 Tübingen, Tübingen, Germany

10

11 \*These authors contributed equally

12 #Corresponding author:

13 Michael Schindler

14 michael.schindler@helmholtz-muenchen.de

15 Fon +49-(0)89-3187-4609

16

17

18

19

20

21

22

1 **Supplemental Figure S1: Quantitative and statistical analyses of FRET signals**  
2 **in 293T and Huh7.5 cells.**

3 Number of independent experiments (n), mean value % FRET+ cells (MF), and  
4 standard deviations (SD) are indicated. Analyses were performed for both  
5 combinations (YFP-protein A + CFP-protein B & CFP-protein A + YFP-protein B). For  
6 calculation of statistical significance, mean FRET signals of n experiments were  
7 compared to the negative control FRET signal (CFP-fusion with YFP-only) with the  
8 two-tailed unpaired Student's t test (Graph Pad Prism 5.0). Significance levels are  
9 indicated as follows:  $p < 0.05$  (\*),  $p < 0.01$  (\*\*) and  $p < 0.001$  (\*\*\*). Grey boxes depict  
10 mean FRET values  $\geq 10\%$  (numbers in red). This threshold was arbitrarily introduced  
11 as additional stringency criterion to define robust FRET of cotransfected fusion  
12 proteins. Some mean FRET values below 10 % also reached statistical significance.  
13 These values are shown in green. Primary data for transfection of 293T cells are  
14 accessible within the supplemental data set (see below).

15  
16  
17  
18  
19  
20  
21  
22

|      |       | A     |            |       |            |       |            |            |            |            |            |            |            |            |            |            |            |            |            |            |            |            |  |
|------|-------|-------|------------|-------|------------|-------|------------|------------|------------|------------|------------|------------|------------|------------|------------|------------|------------|------------|------------|------------|------------|------------|--|
|      |       | Core  |            | E1    |            | E2    |            | p7         |            | NS2        |            | NS3        |            | NS4A       |            | NS4B       |            | NS5A       |            | NS5B       |            |            |  |
| B    |       | 293T  | Huh7.5     | 293T  | Huh7.5     | 293T  | Huh7.5     | 293T       | Huh7.5     | 293T       | Huh7.5     | 293T       | Huh7.5     | 293T       | Huh7.5     | 293T       | Huh7.5     | 293T       | Huh7.5     | 293T       | Huh7.5     |            |  |
| Core | n     | 9     | 8          |       |            |       |            |            |            |            |            |            |            |            |            |            |            |            |            |            |            |            |  |
|      | MF    | 67.93 | 44.89      |       |            |       |            |            |            |            |            |            |            |            |            |            |            |            |            |            |            |            |  |
|      | SD    | 14.88 | 25.25      |       |            |       |            |            |            |            |            |            |            |            |            |            |            |            |            |            |            |            |  |
| E1   | n     | 9     | 7          | 9     | not tested |       |            |            |            |            |            |            |            |            |            |            |            |            |            |            |            |            |  |
|      | MF    | 3.91  | 2.87       | 1.88  | not tested |       |            |            |            |            |            |            |            |            |            |            |            |            |            |            |            |            |  |
|      | SD    | 3.33  | 3.53       | 2.35  | not tested |       |            |            |            |            |            |            |            |            |            |            |            |            |            |            |            |            |  |
|      | ns    | *     | *          | *     |            |       |            |            |            |            |            |            |            |            |            |            |            |            |            |            |            |            |  |
|      | n     | 12    | 1          |       |            |       |            |            |            |            |            |            |            |            |            |            |            |            |            |            |            |            |  |
|      | MF    | 1.84  | 0.90       |       |            |       |            |            |            |            |            |            |            |            |            |            |            |            |            |            |            |            |  |
| E2   | n     | 9     | 3          | 11    | not tested | 18    | 13         |            |            |            |            |            |            |            |            |            |            |            |            |            |            |            |  |
|      | MF    | 0.9   | 0.00       | 0.44  | not tested | 62.29 | 47.12      |            |            |            |            |            |            |            |            |            |            |            |            |            |            |            |  |
|      | SD    | 1.91  | 0.00       | 0.45  | not tested | 28.53 | 34.40      |            |            |            |            |            |            |            |            |            |            |            |            |            |            |            |  |
|      | ns    | ns    | ns         | ns    |            | ***   | ***        |            |            |            |            |            |            |            |            |            |            |            |            |            |            |            |  |
|      | n     | 23    | 6          | 17    | 7          |       |            |            |            |            |            |            |            |            |            |            |            |            |            |            |            |            |  |
|      | MF    | 21.11 | 3.00       | 74.76 | 42.21      |       |            |            |            |            |            |            |            |            |            |            |            |            |            |            |            |            |  |
| p7   | n     | 9     | 3          | 10    | 2          | 17    | 13         | 23         | 11         |            |            |            |            |            |            |            |            |            |            |            |            |            |  |
|      | MF    | 6.43  | 0.00       | 0.18  | 0.35       | 18.36 | 34.92      | 29.30      | 6.69       |            |            |            |            |            |            |            |            |            |            |            |            |            |  |
|      | SD    | 11.16 | 0.00       | 0.23  | 0.50       | 20.68 | 31.22      | 18.37      | 4.66       |            |            |            |            |            |            |            |            |            |            |            |            |            |  |
|      | ns    | ns    | ns         | ns    | .          | ***   | **         | ***        | ***        |            |            |            |            |            |            |            |            |            |            |            |            |            |  |
|      | n     | 15    | 5          | 16    | 14         | 19    | 17         |            |            |            |            |            |            |            |            |            |            |            |            |            |            |            |  |
|      | MF    | 27.78 | 0.62       | 16.41 | 7.69       | 6.88  | 4.67       |            |            |            |            |            |            |            |            |            |            |            |            |            |            |            |  |
| NS2  | n     | 10    | 3          | 11    | not tested | 17    | 9          | 24         | 6          | 38         | 8          |            |            |            |            |            |            |            |            |            |            |            |  |
|      | MF    | 0.09  | 0.00       | 0.34  | not tested | 40.11 | 16.60      | 40.73      | 6.18       | 60.31      | 56.30      |            |            |            |            |            |            |            |            |            |            |            |  |
|      | SD    | 0.19  | 0.00       | 0.35  | not tested | 32.95 | 21.98      | 26.82      | 8.93       | 24.46      | 19.70      |            |            |            |            |            |            |            |            |            |            |            |  |
|      | ns    | ns    | ns         | ns    |            | ***   | *          | ***        | ns         | ***        | ***        |            |            |            |            |            |            |            |            |            |            |            |  |
|      | n     | 35    | 3          | 34    | 9          | 39    | 2          | 32         | 6          |            |            |            |            |            |            |            |            |            |            |            |            |            |  |
|      | MF    | 15.54 | 1.03       | 17.78 | 4.22       | 8.81  | 0.30       | 22.54      | 14.05      |            |            |            |            |            |            |            |            |            |            |            |            |            |  |
| NS3  | n     | 9     | 1          | 11    | 3          | 14    | 2          | 14         | 4          | 23         | 7          | 28         | 13         |            |            |            |            |            |            |            |            |            |  |
|      | MF    | 0.28  | 0.00       | 1.88  | 0.00       | 2.18  | 7.05       | 8.00       | 0.40       | 2.90       | 4.84       | 9.95       | 24.16      |            |            |            |            |            |            |            |            |            |  |
|      | SD    | 0.35  | .          | 4.57  | 0.00       | 2.13  | 5.87       | 9.87       | 0.45       | 9.64       | 12.72      | 10.5       | 11.65      |            |            |            |            |            |            |            |            |            |  |
|      | ns    | ns    | ns         | ns    | ns         | **    | ns         | **         | ns         | ns         | ns         | ns         | ns         |            |            |            |            |            |            |            |            |            |  |
|      | n     | 13    | not tested | 13    | 6          | 14    | 3          | 15         | 2          | 14         | 1          |            |            |            |            |            |            |            |            |            |            |            |  |
|      | MF    | 1.7   | not tested | 5.96  | 9.30       | 1.43  | 2.13       | 3.61       | 7.65       | 0.24       | 0.10       |            |            |            |            |            |            |            |            |            |            |            |  |
| NS4A | n     | 8     | not tested | 10    | not tested | 14    | 2          | 10         | not tested | 22         | 8          | 10         | not tested |            |            |            |            |            |            |            |            |            |  |
|      | MF    | 0.20  | not tested | 0.07  | not tested | 5.49  | 0.35       | 0.16       | not tested | 0.71       | 11.44      | 1.28       | not tested |            |            |            |            |            |            |            |            |            |  |
|      | SD    | 0.49  | not tested | 0.09  | not tested | 17.50 | 0.50       | 0.21       | not tested | 1.34       | 18.44      | 1.48       | not tested |            |            |            |            |            |            |            |            |            |  |
|      | ns    | ns    | ns         | ns    | ns         | ns    | .          | ns         | ns         | ns         | **         | ns         | ns         |            |            |            |            |            |            |            |            |            |  |
|      | n     | 9     | not tested | 9     | not tested | 10    | not tested | 10         | not tested | 9          | not tested | 20         | 14         |            |            |            |            |            |            |            |            |            |  |
|      | MF    | 0.54  | not tested | 4.79  | not tested | 0.60  | not tested | 0.60       | not tested | 2.00       | not tested | 27.97      | 2.46       |            |            |            |            |            |            |            |            |            |  |
| NS4B | n     | 8     | not tested | 10    | not tested | 14    | not tested | 13         | not tested | 29         | 2          | 11         | not tested | 10         | not tested | 13         | 6          |            |            |            |            |            |  |
|      | MF    | 0.64  | not tested | 0.09  | not tested | 5.66  | not tested | 8.15       | not tested | 7.69       | 0.40       | 1.01       | not tested | 4.05       | not tested | 36.18      | 7.68       |            |            |            |            |            |  |
|      | SD    | 1.27  | not tested | 0.14  | not tested | 6.32  | not tested | 15.58      | not tested | 11.32      | 0.00       | 1.52       | not tested | 8.08       | not tested | 16.68      | 7.74       |            |            |            |            |            |  |
|      | ns    | ns    | ns         | ns    | ns         | ***   | *          | ns         | ns         | ns         | .          | *          | ns         | ns         | ns         | ***        | *          |            |            |            |            |            |  |
|      | n     | 9     | not tested | 9     | not tested | 10    | not tested | 10         | not tested | 11         | not tested | 9          | not tested | 8          | not tested |            |            |            |            |            |            |            |  |
|      | MF    | 1.03  | not tested | 1.08  | not tested | 0.09  | not tested | 0.62       | not tested | 0.36       | not tested | 0.23       | not tested | 0.30       | not tested |            |            |            |            |            |            |            |  |
| NS5A | n     | 8     | not tested | 9     | not tested | 14    | not tested | 14         | not tested | 24         | 3          | 13         | not tested | 9          | not tested | 8          | not tested | 20         | 9          |            |            |            |  |
|      | MF    | 2.15  | not tested | 0.28  | not tested | 2.82  | not tested | 4.99       | not tested | 3.68       | 0.17       | 0.47       | not tested | 1.69       | not tested | 0.93       | not tested | 12.69      | 14.92      |            |            |            |  |
|      | SD    | 4.93  | not tested | 0.33  | not tested | 4.64  | not tested | 8.19       | not tested | 8.12       | 0.29       | 0.66       | not tested | 2.19       | not tested | 2.10       | not tested | 12.12      | 8.90       |            |            |            |  |
|      | ns    | ns    | ns         | ns    | ns         | *     | *          | *          | ns         | ***        | **         |            |            |            |  |
|      | n     | 11    | not tested | 15    | not tested | 15    | not tested | 11         | not tested | 8          | not tested | 11         | not tested | 10         | not tested | 9          | not tested | 9          | not tested |            |            |            |  |
|      | MF    | 0.30  | not tested | 0.65  | not tested | 0.92  | not tested | 1.18       | not tested | 0.14       | not tested | 0.08       | not tested | 0.15       | not tested | 0.89       | not tested | 1.07       | not tested |            |            |            |  |
| NS5B | n     | 8     | 2          | 11    | 3          | 16    | 3          | 8          | 21         | 13         | 9          | 8          | 15         | 8          | 15         | 20         | 9          | 8          | 0.15       | not tested | 5.10       | not tested |  |
|      | MF    | 7.91  | 0.00       | 0.22  | 0.00       | 2.09  | 0.00       | 5.21       | not tested | 0.91       | not tested | 0.15       | not tested | 0.59       | not tested | 0.44       | not tested | 0.15       | not tested | 8.72       | not tested |            |  |
|      | SD    | 11.36 | 0.00       | 0.23  | 0.00       | 4.75  | 0.00       | 7.74       | not tested | 2.26       | not tested | 0.23       | not tested | 1.21       | not tested | 0.48       | not tested | 0.19       | not tested | *          | not tested |            |  |
|      | ns    | ns    | ns         | ns    | ns         | ns    | ns         | *          | ns         | *          | not tested |            |  |
|      | n     | 20    | 6          | 20    | 4          | 18    | 6          | 14         | not tested | 14         | not tested | 13         | not tested | 12         | not tested | 12         | not tested | 20         | not tested |            |            |            |  |
|      | MF    | 13.11 | 3.90       | 23.62 | 20.55      | 12.97 | 18.42      | 4.07       | not tested | 1.34       | not tested | 0.91       | not tested | 0.19       | not tested | 1.10       | not tested | 7.06       | not tested |            |            |            |  |
| SD   | 10.43 | 6.82  | 21.94      | 5.03  | 15.34      | 15.36 | 7.96       | not tested | 2.29       | not tested | 1.40       | not tested | 0.38       | not tested | 1.62       | not tested | 9.50       | not tested |            |            |            |            |  |
|      |       | ***   | ns         | ***   | ***        | ***   | **         | ns         | **         | ns         | ***        | ns         | ns         | ns         |  |

p < 0.05 \*  
p < 0.01 \*\*  
p < 0.001 \*\*\*

p > 0.05 ns

mean above 10 % threshold

mean below 10 % threshold

not significant

n number of experiments  
MF mean value % FRET+ cells  
SD standard deviation

1 **Supplemental Dataset: FRET results of HCV CFP and YFP fusion proteins**  
2 **transfected in 293T cells.**

3 The percentage of FRET+ cells (mean) from the indicated number of experiments (n)  
4 as well as standard deviation (SD) is presented in every graph (left panel). We  
5 furthermore show a representative example of the cotransfection efficiency (%  
6 cotransfected cells) and the percentage of FRET+ cells according to the gating  
7 strategy previously established (Banning et al., 2010 PLoS ONE 5(2): e9344).  
8 Furthermore, the subcellular localization of the respective fusion proteins was  
9 analysed by confocal microscopy (right panel; CFP is false colored in red and YFP in  
10 green).

**CFP-Core  
tested with:**

**Interaction via FACS-FRET**

**Colocalization via CLSM**

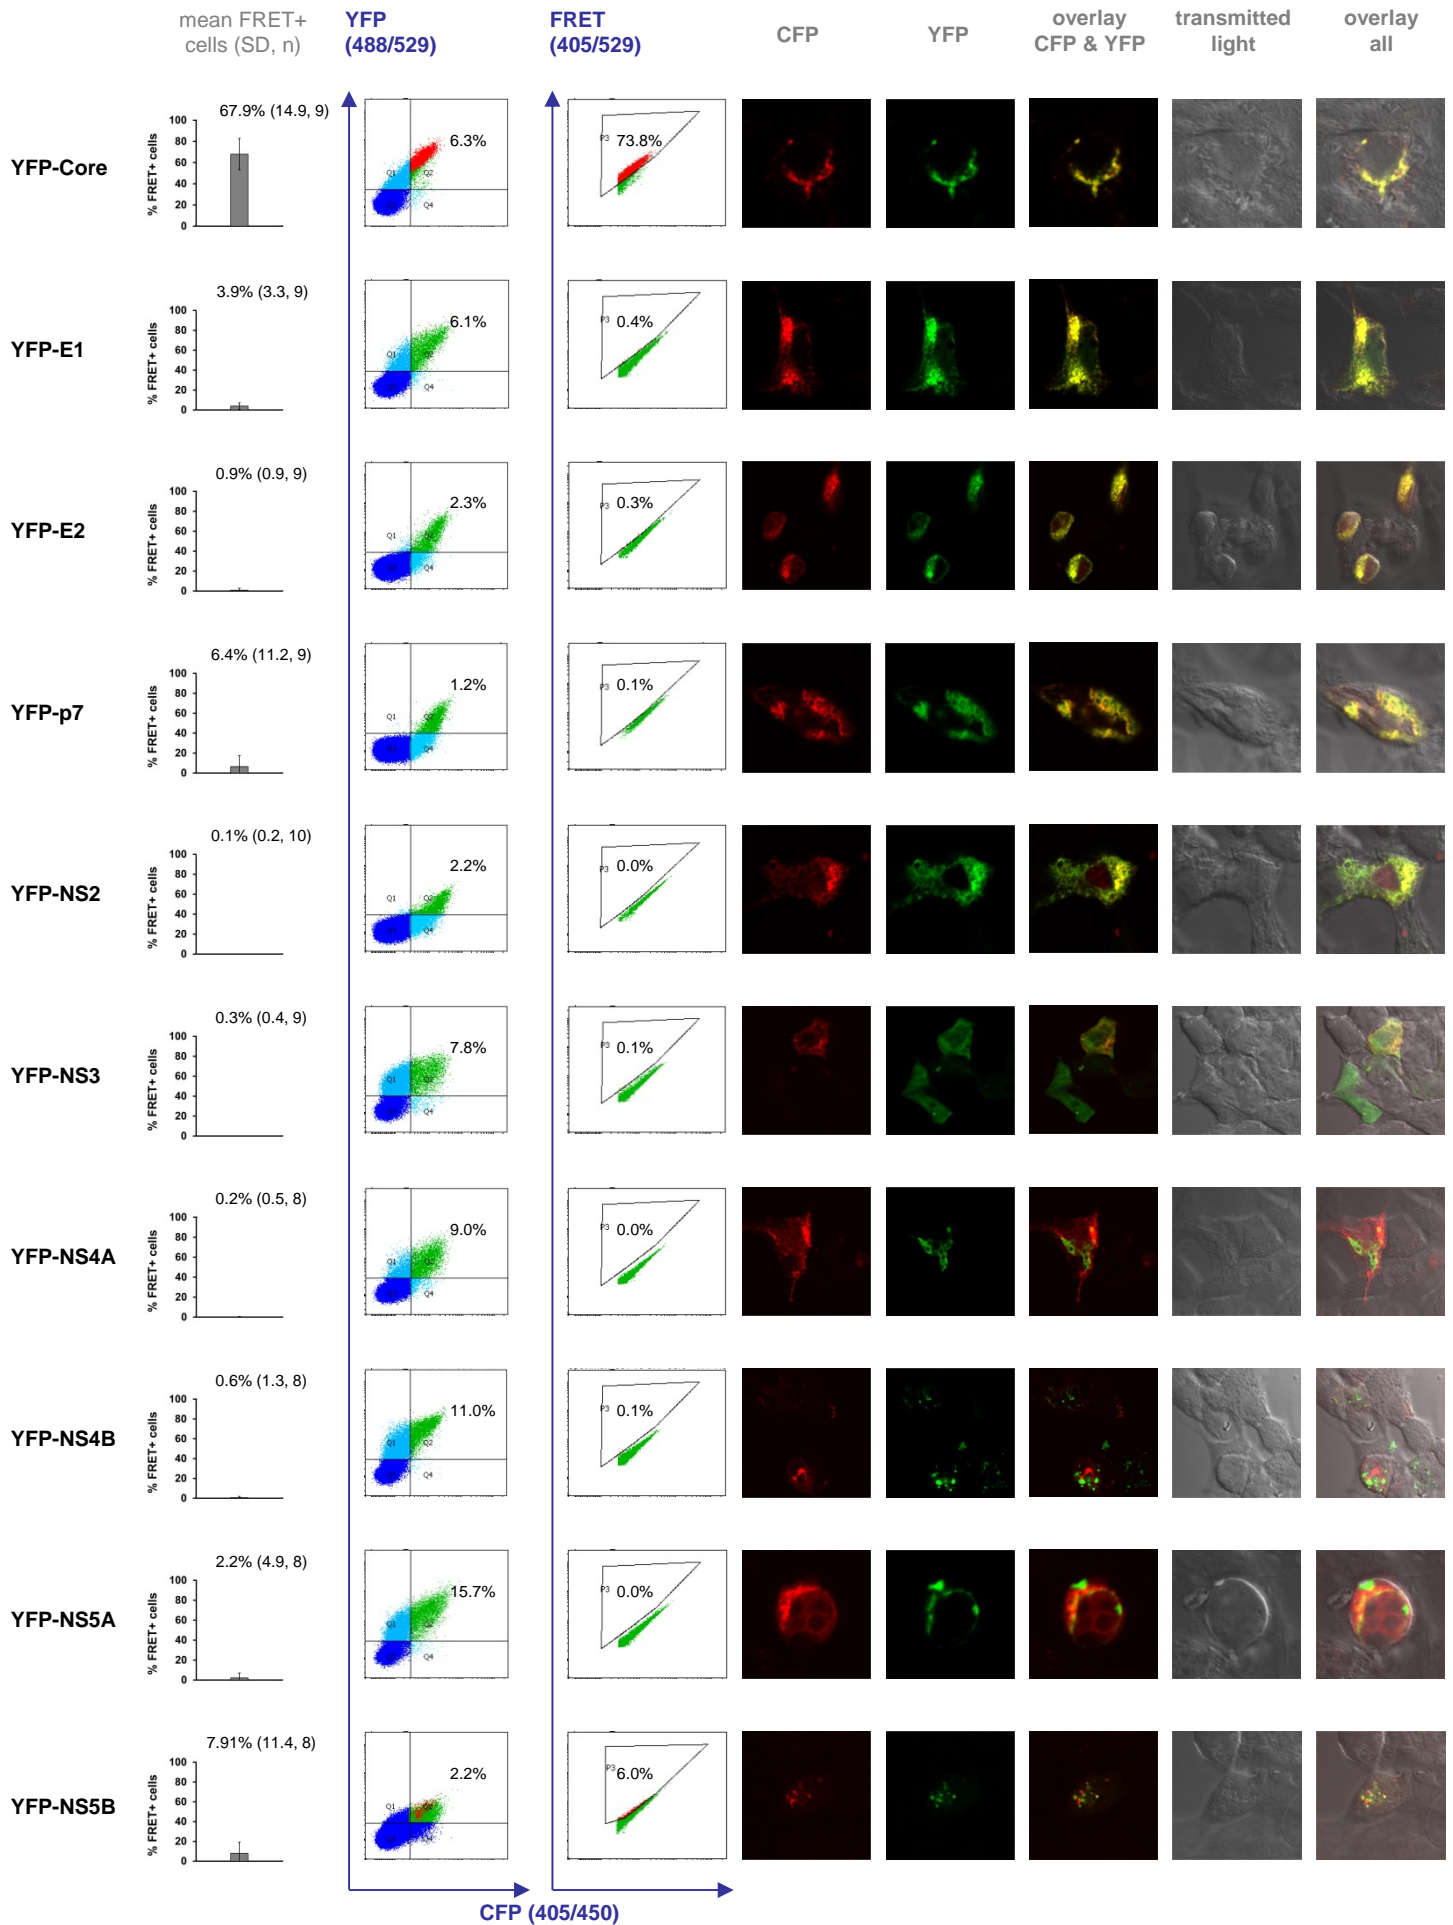

**CFP-E1**  
tested with:

**Interaction via FACS-FRET**

**Colocalization via CLSM**

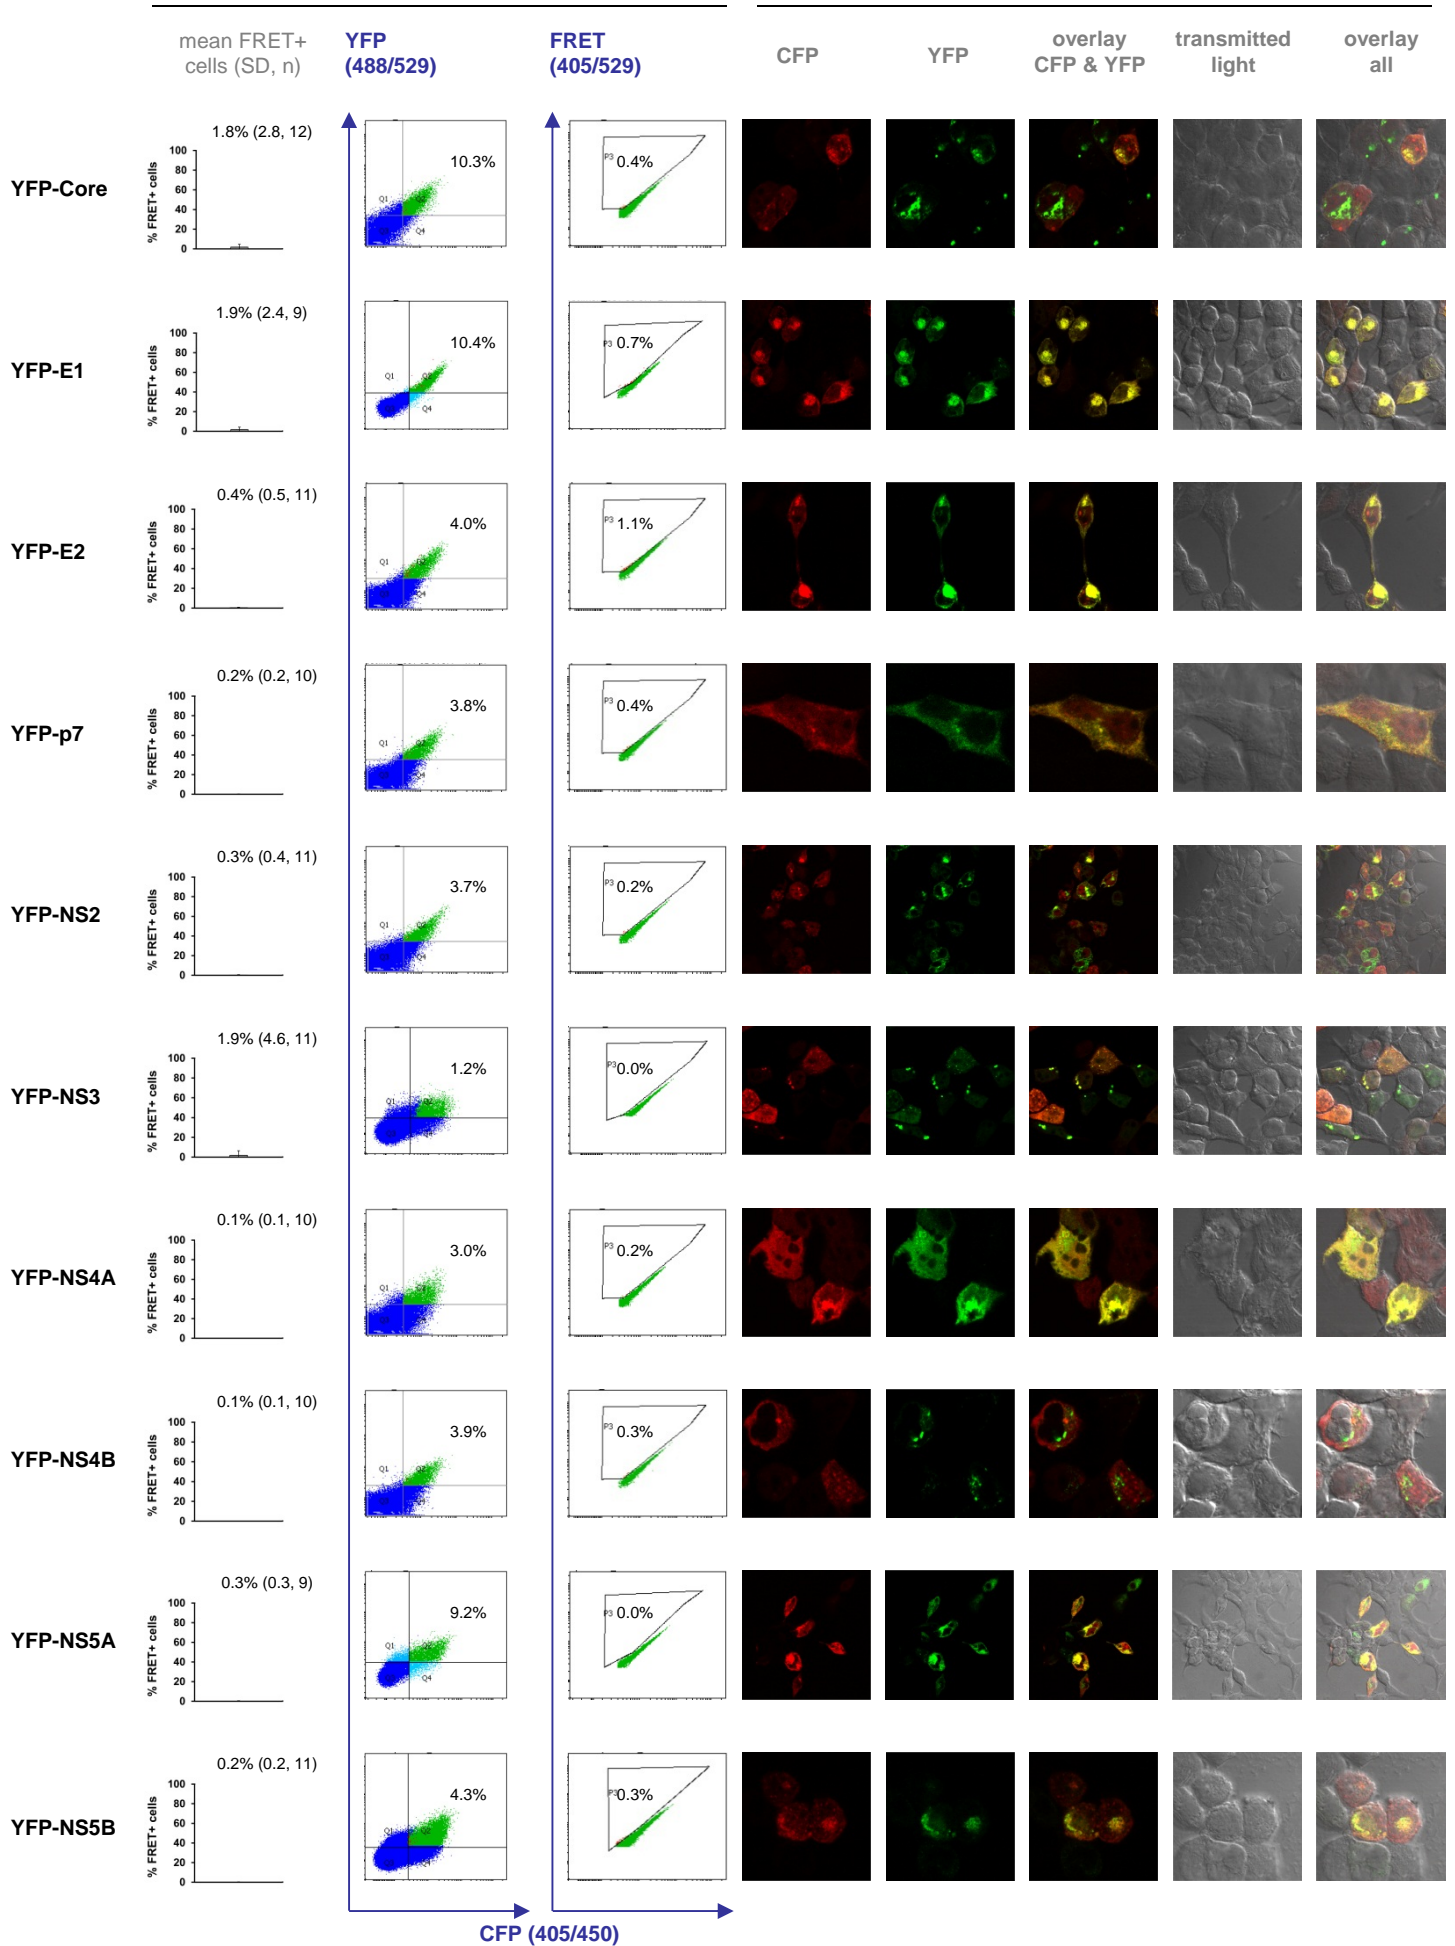

**CFP-E2**  
tested with:

**Interaction via FACS-FRET**

**Colocalization via CLSM**

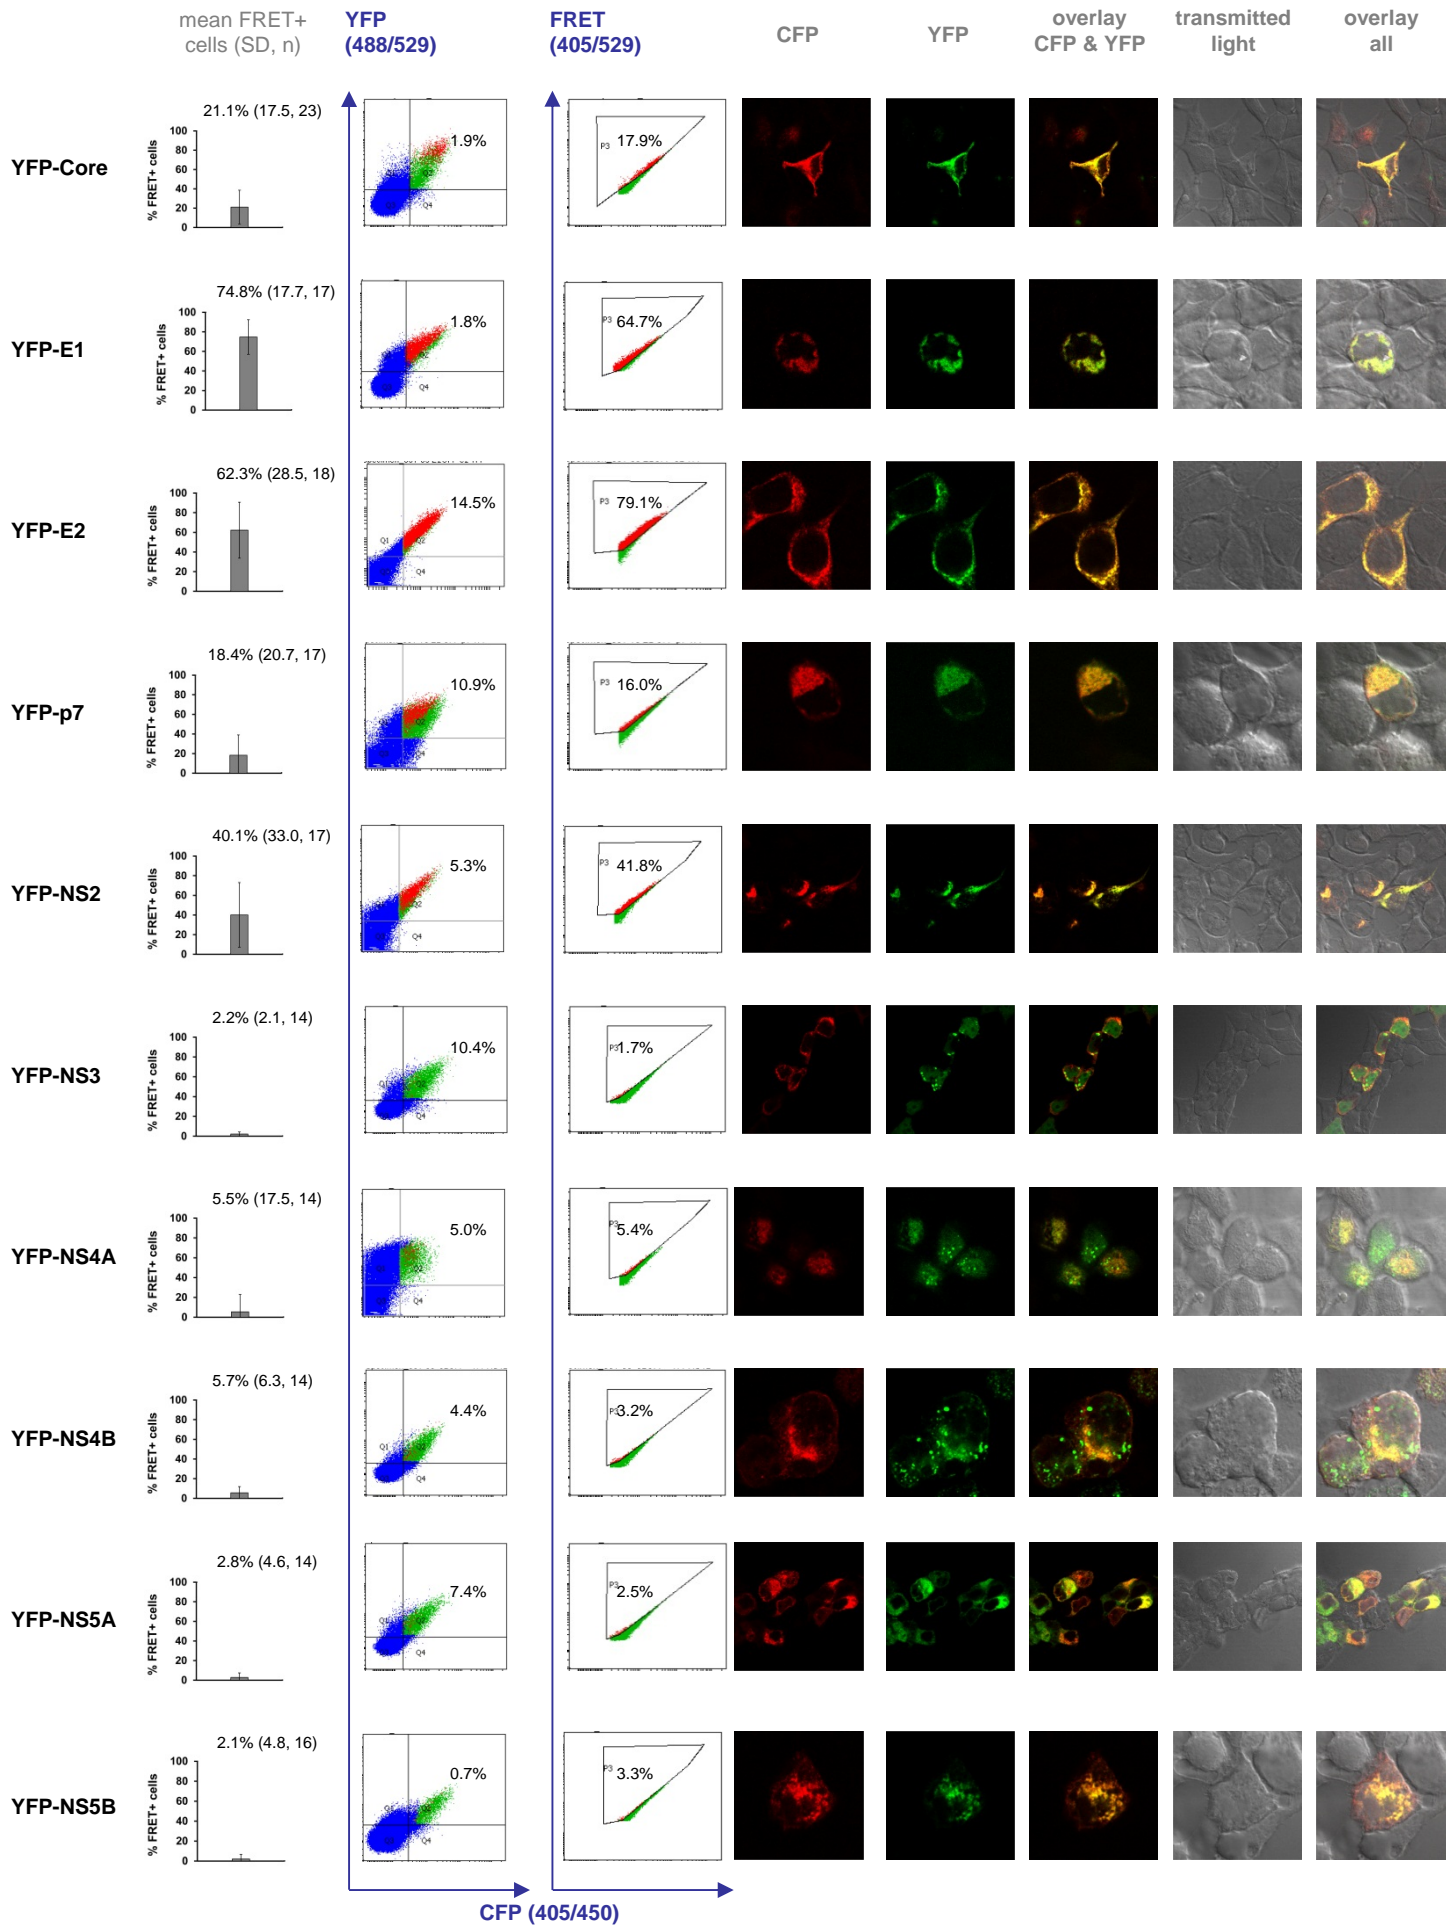

**CFP-p7**  
tested with:

**Interaction via FACS-FRET**

**Colocalization via CLSM**

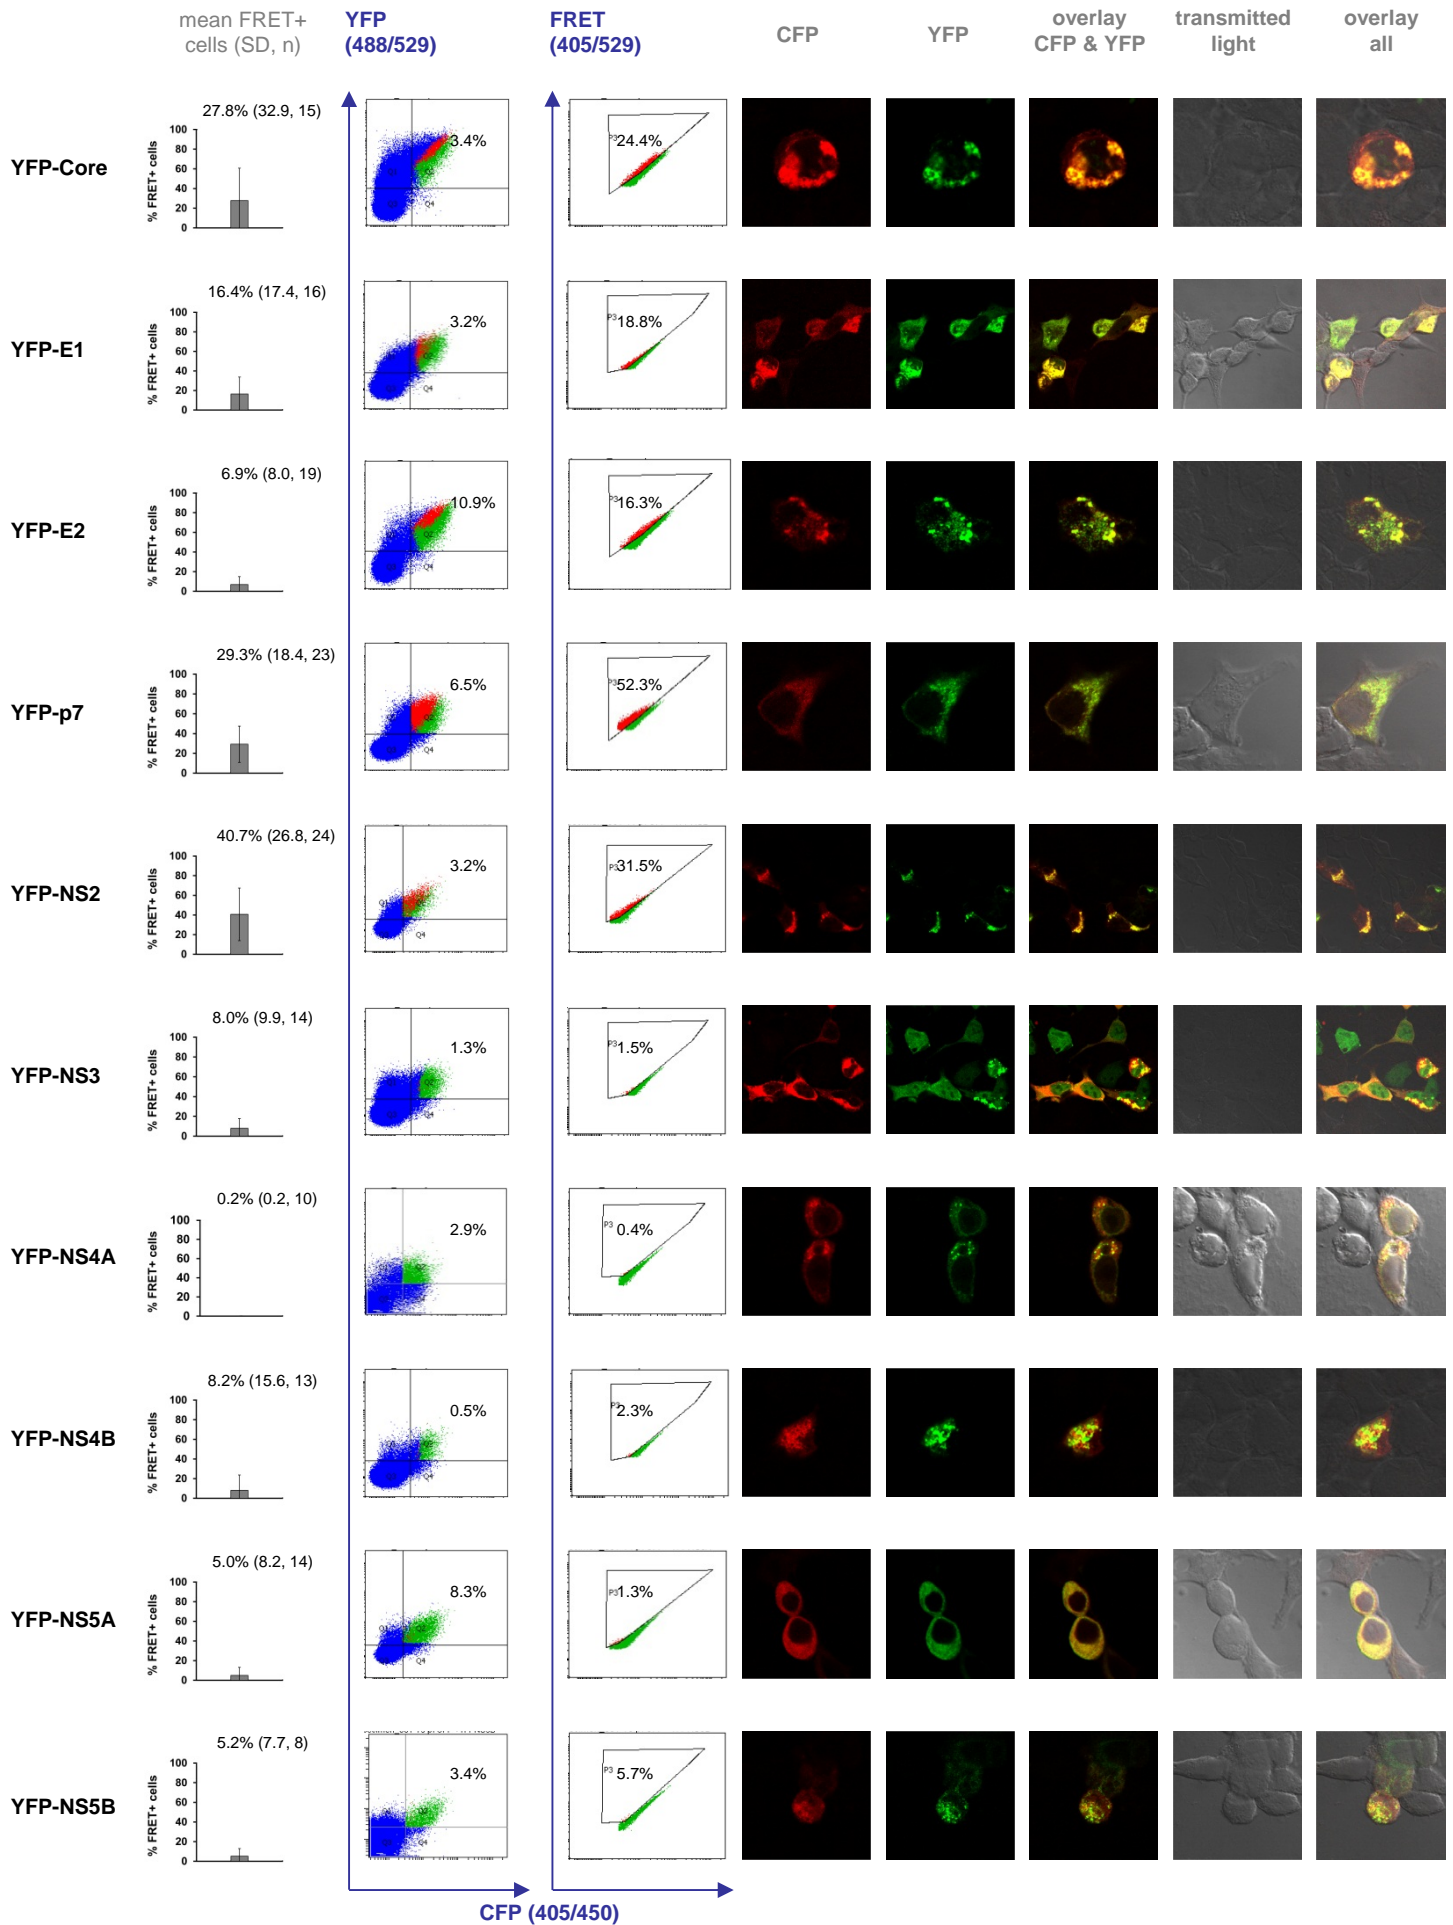



**CFP-NS2**  
tested with:

**Interaction via FACS-FRET**

**Colocalization via CLSM**

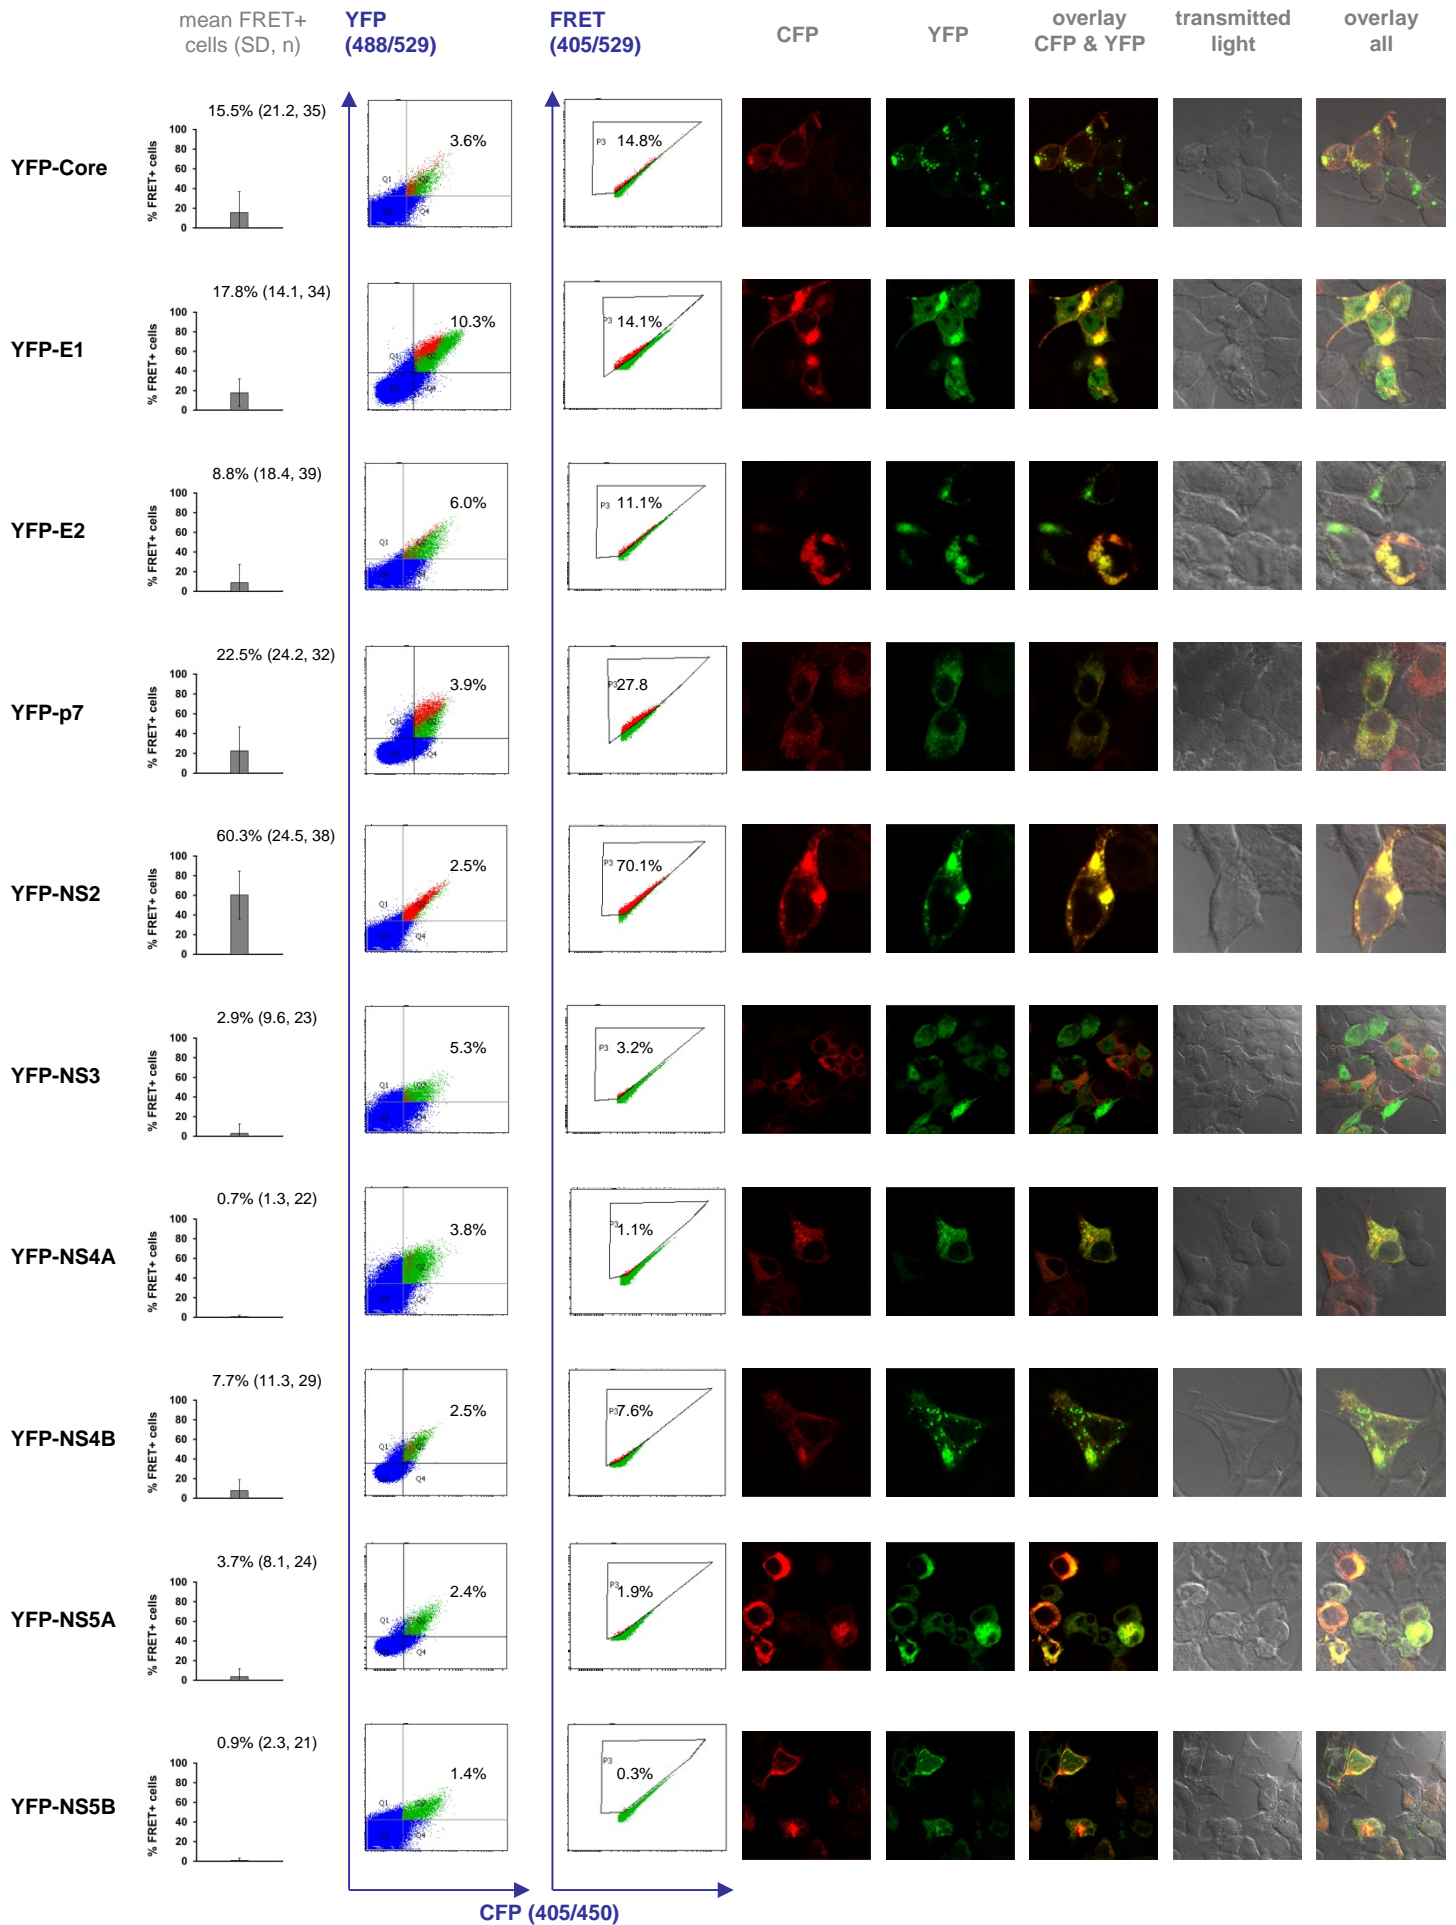

**CFP-NS3**  
tested with:

**Interaction via FACS-FRET**

**Colocalization via CLSM**

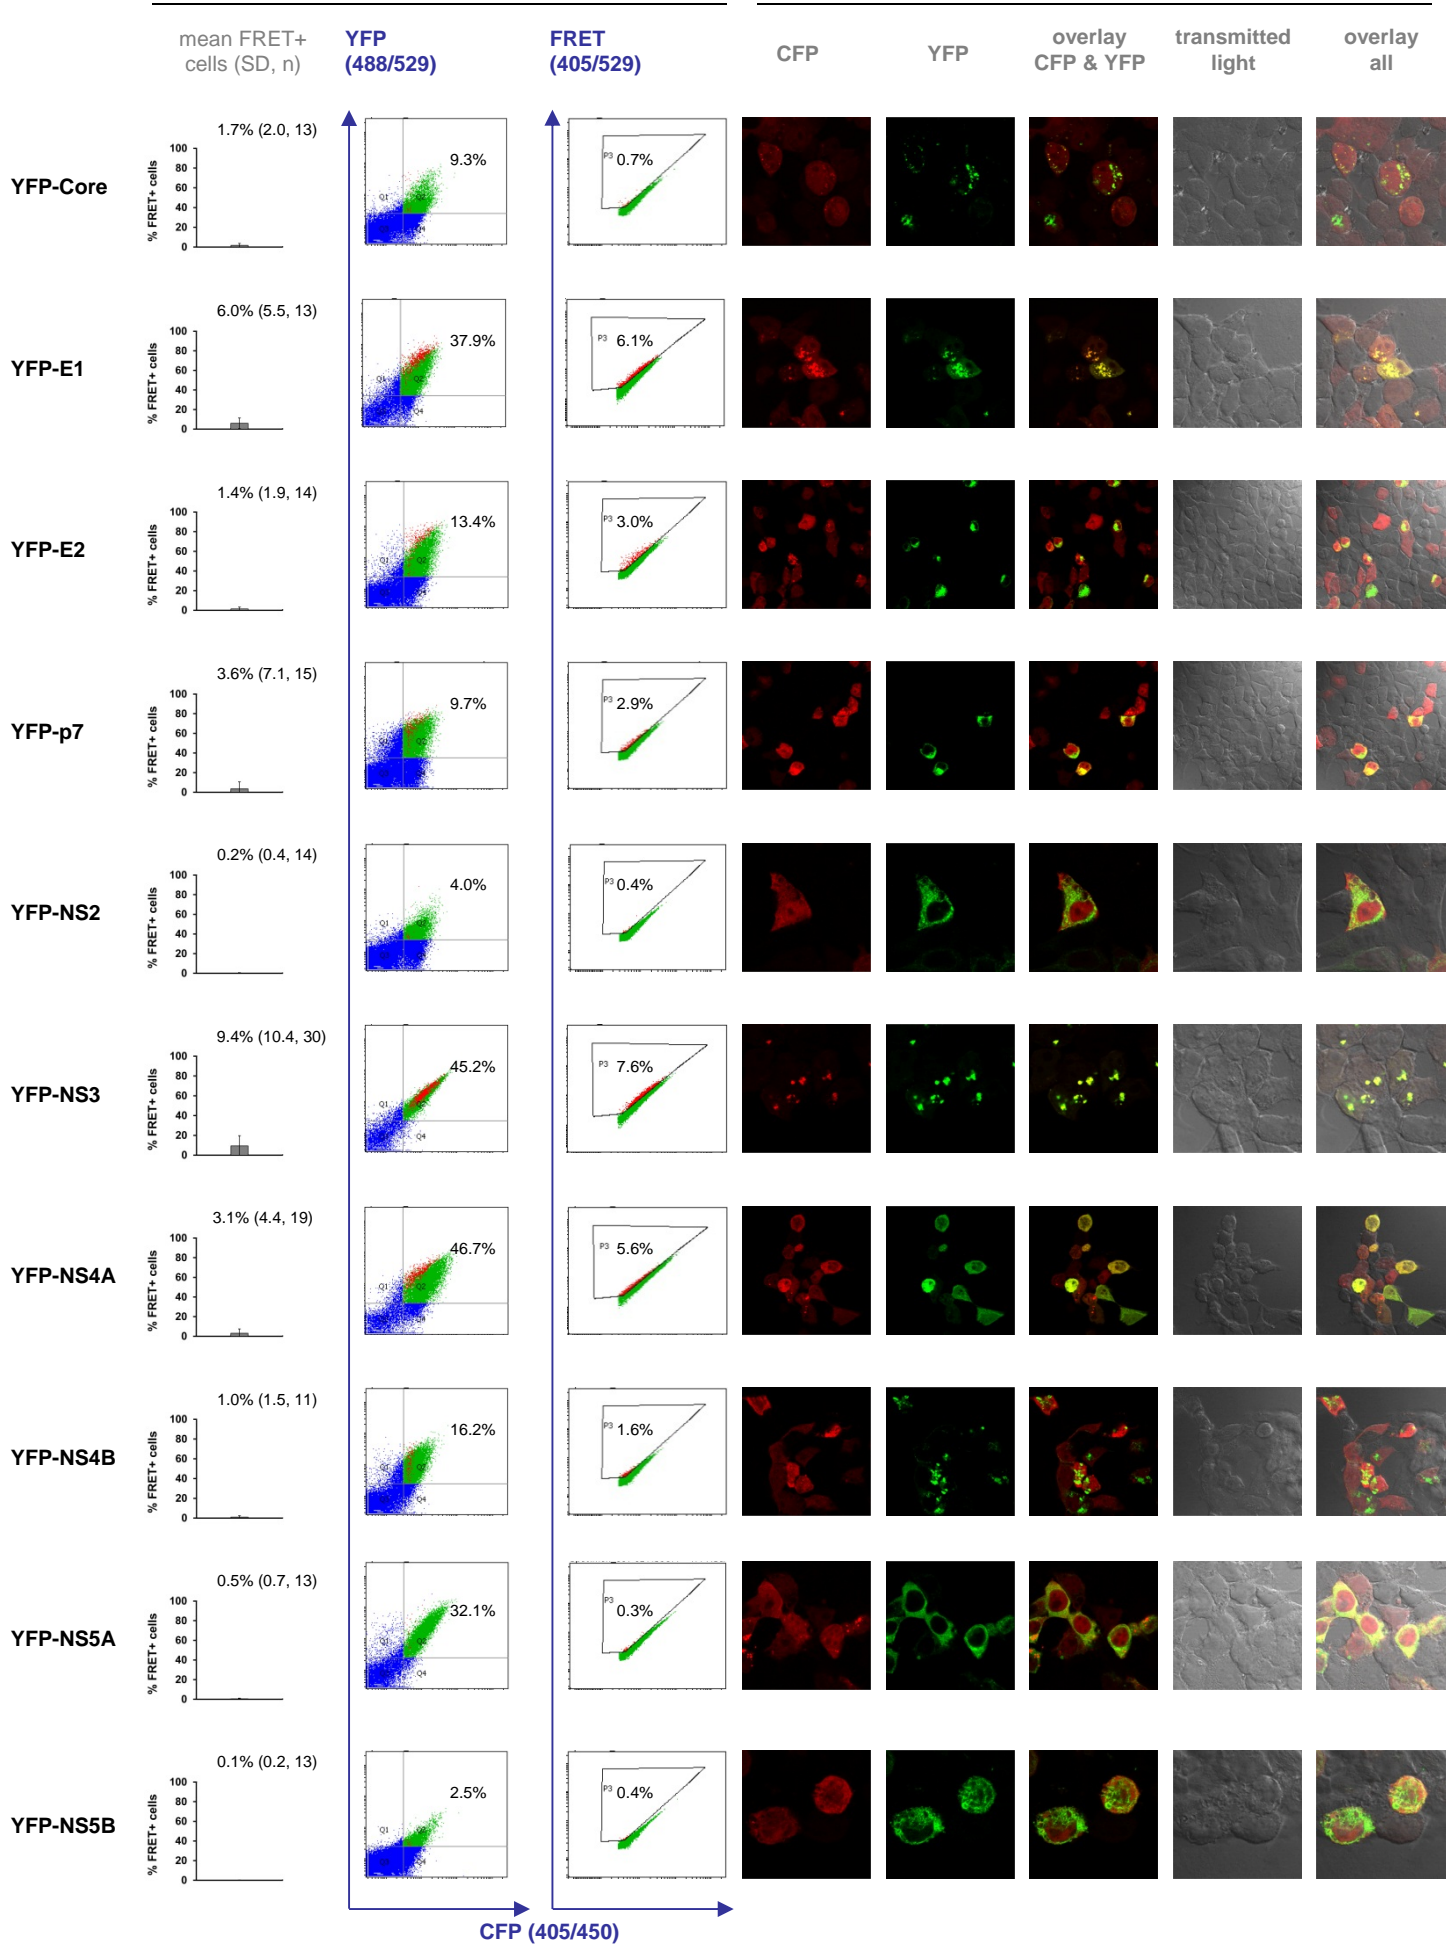

**CFP-NS4A**  
tested with:

**Interaction via FACS-FRET**

**Colocalization via CLSM**

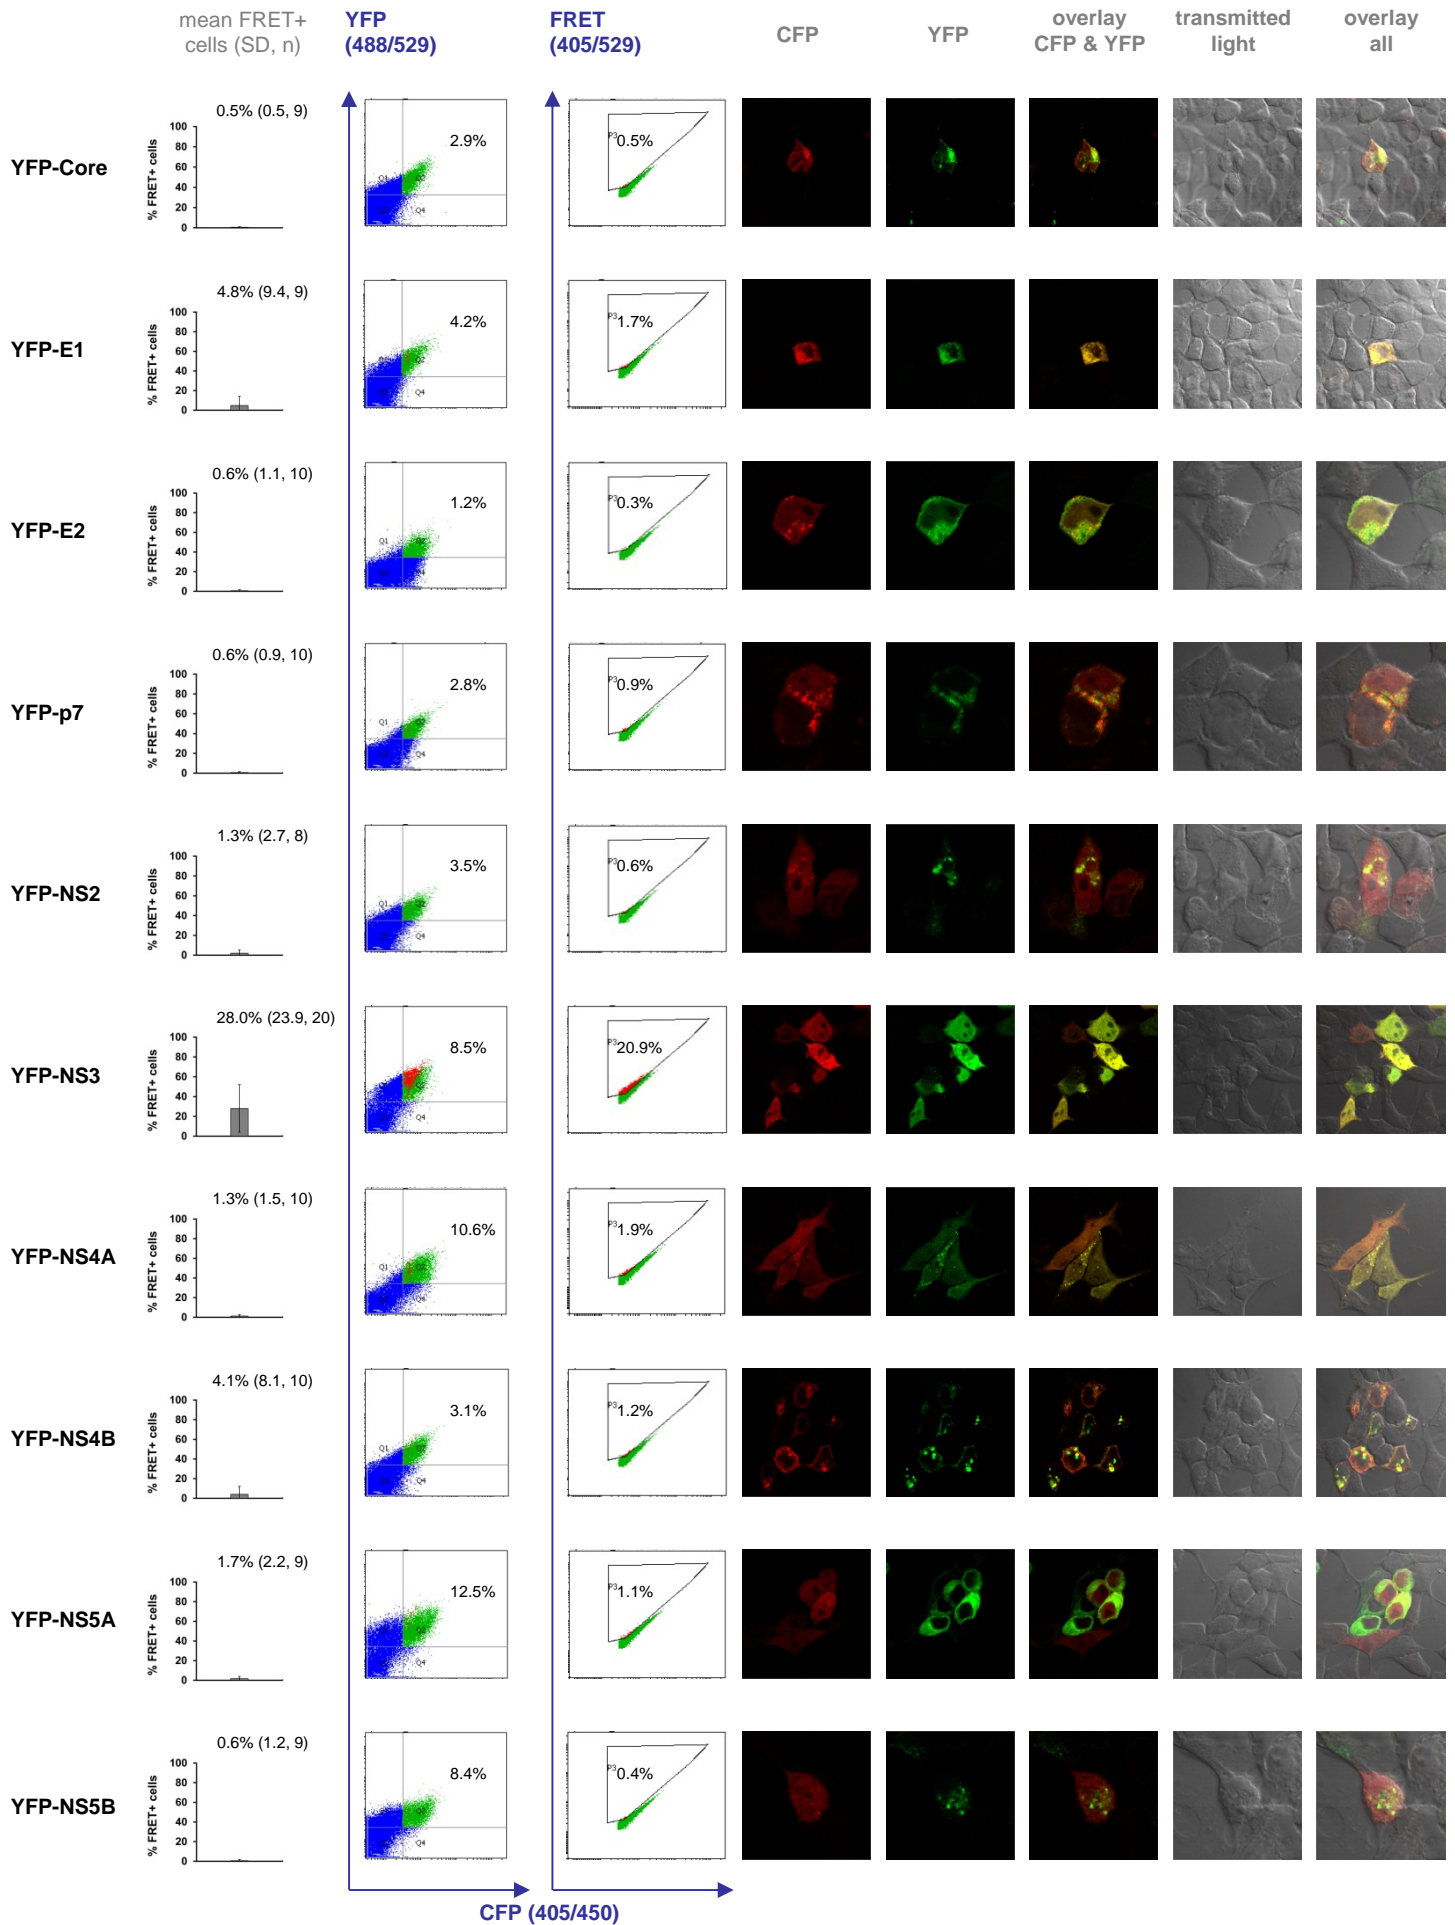

**CFP-NS4B**  
tested with:

**Interaction via FACS-FRET**

**Colocalization via CLSM**

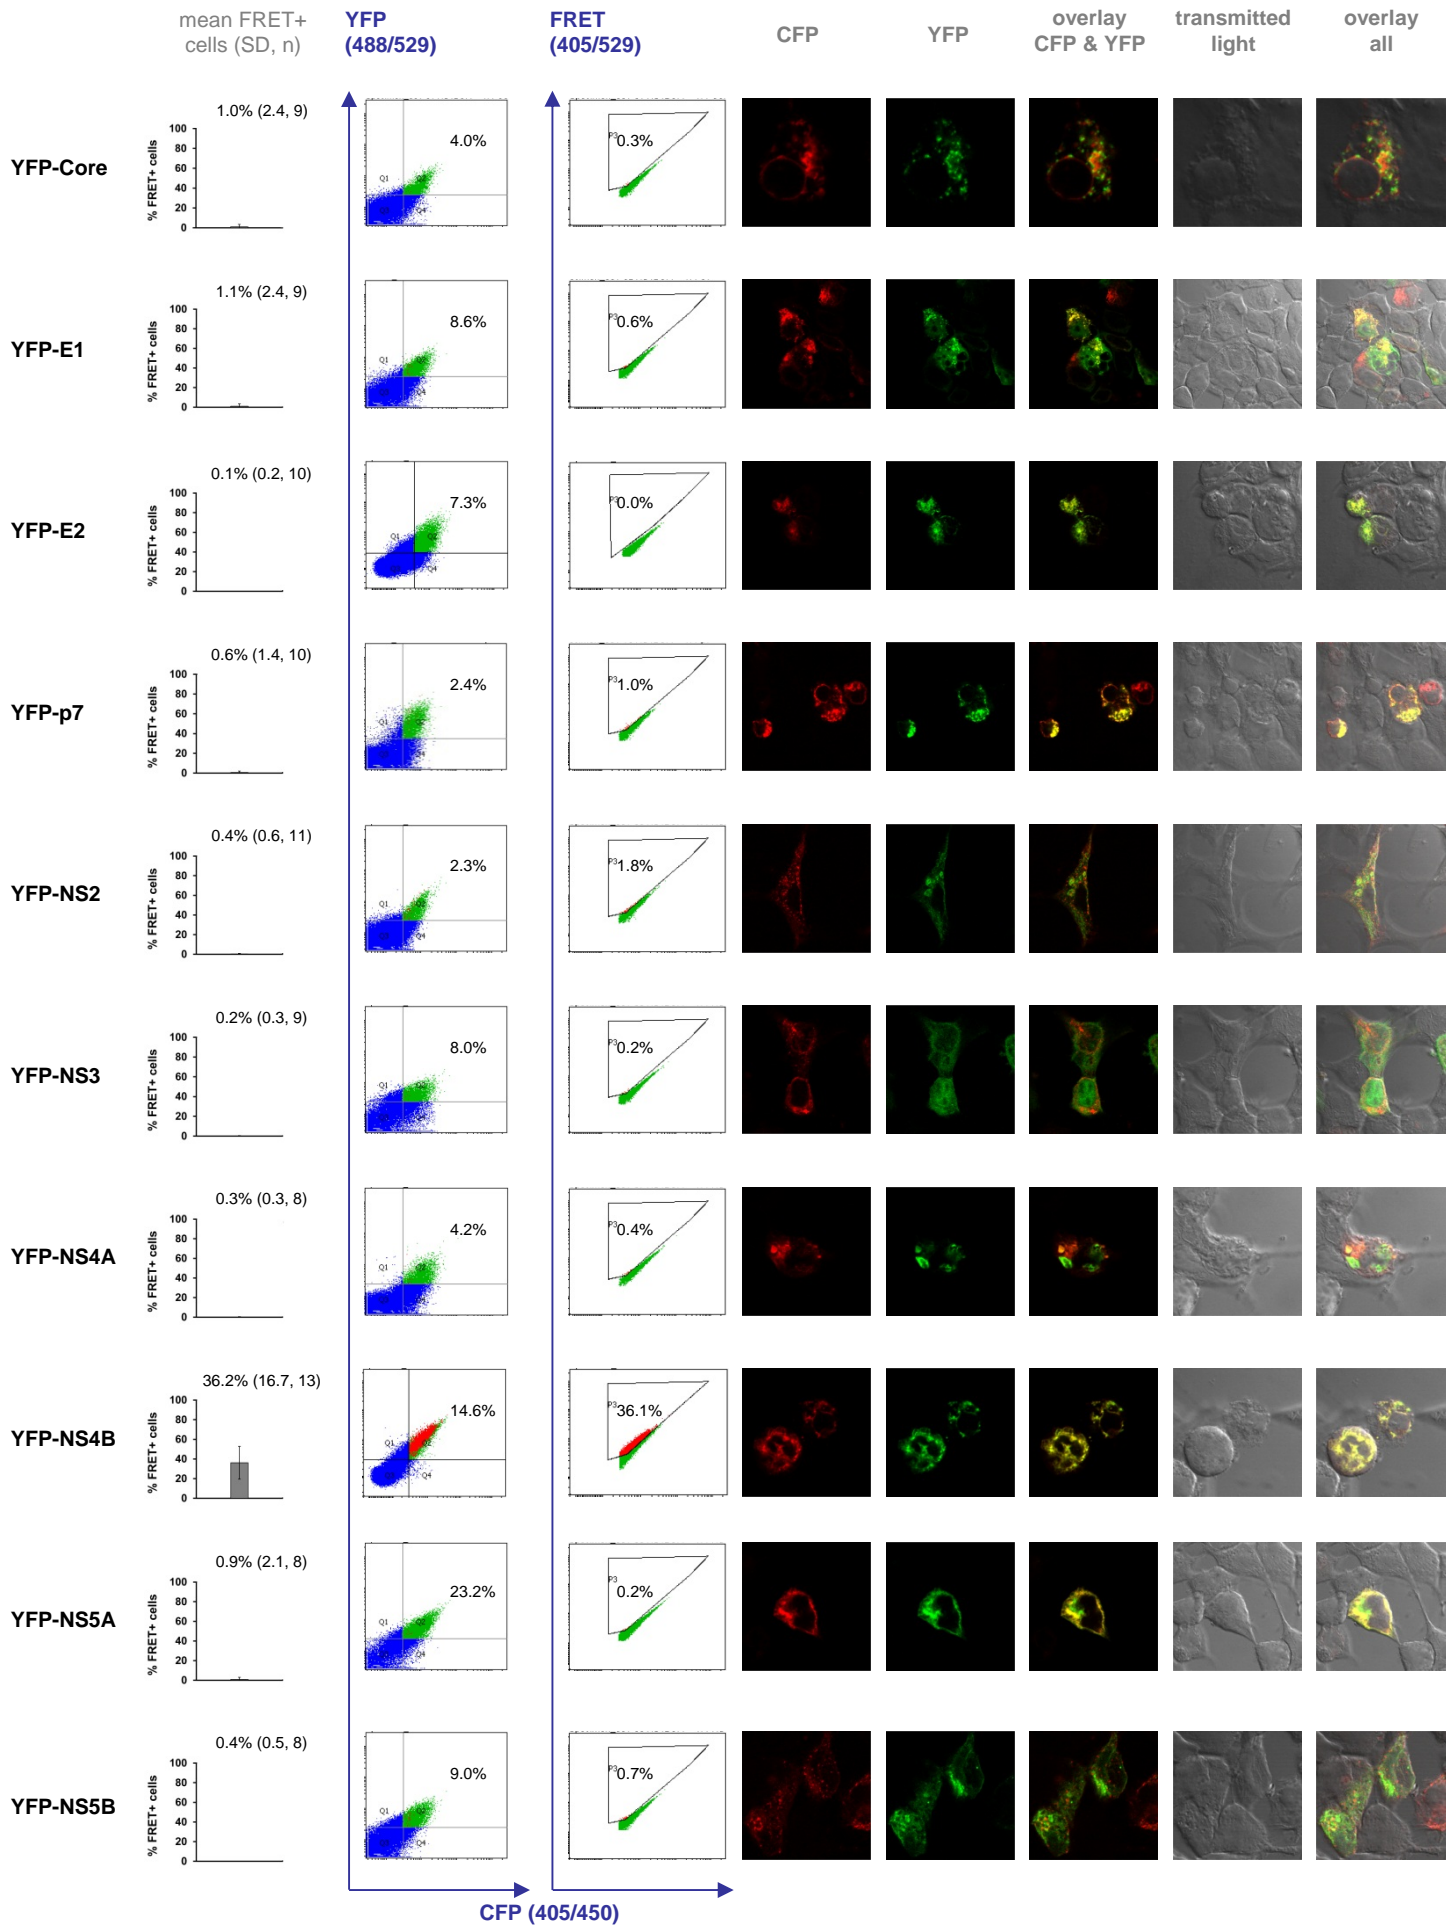

**CFP-NS5A**  
tested with:

**Interaction via FACS-FRET**

**Colocalization via CLSM**

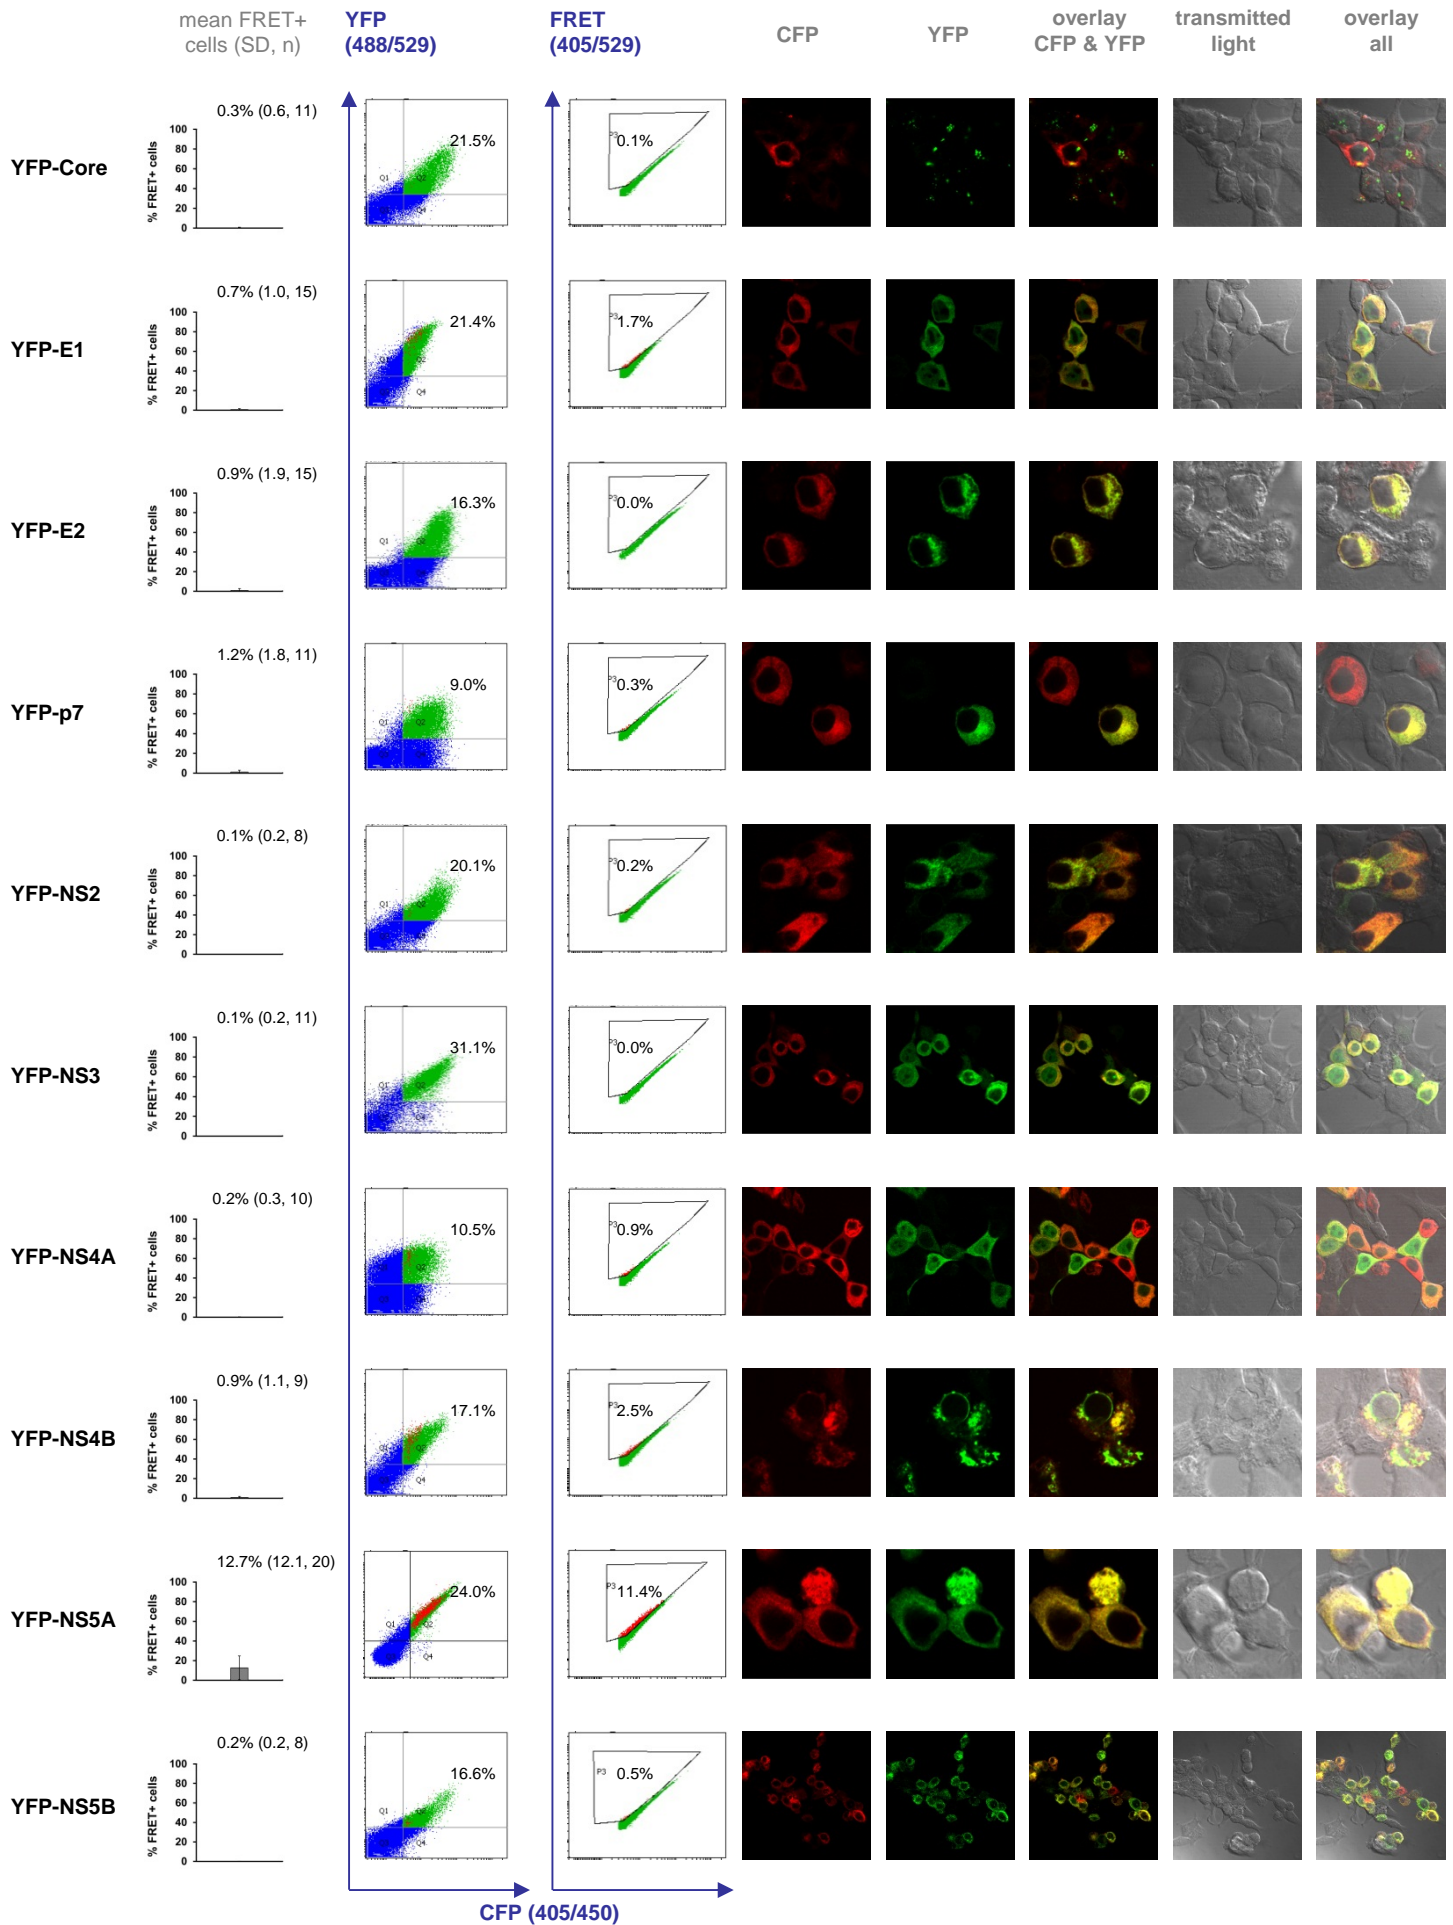

**CFP-NS5B**  
tested with:

**Interaction via FACS-FRET**

**Colocalization via CLSM**

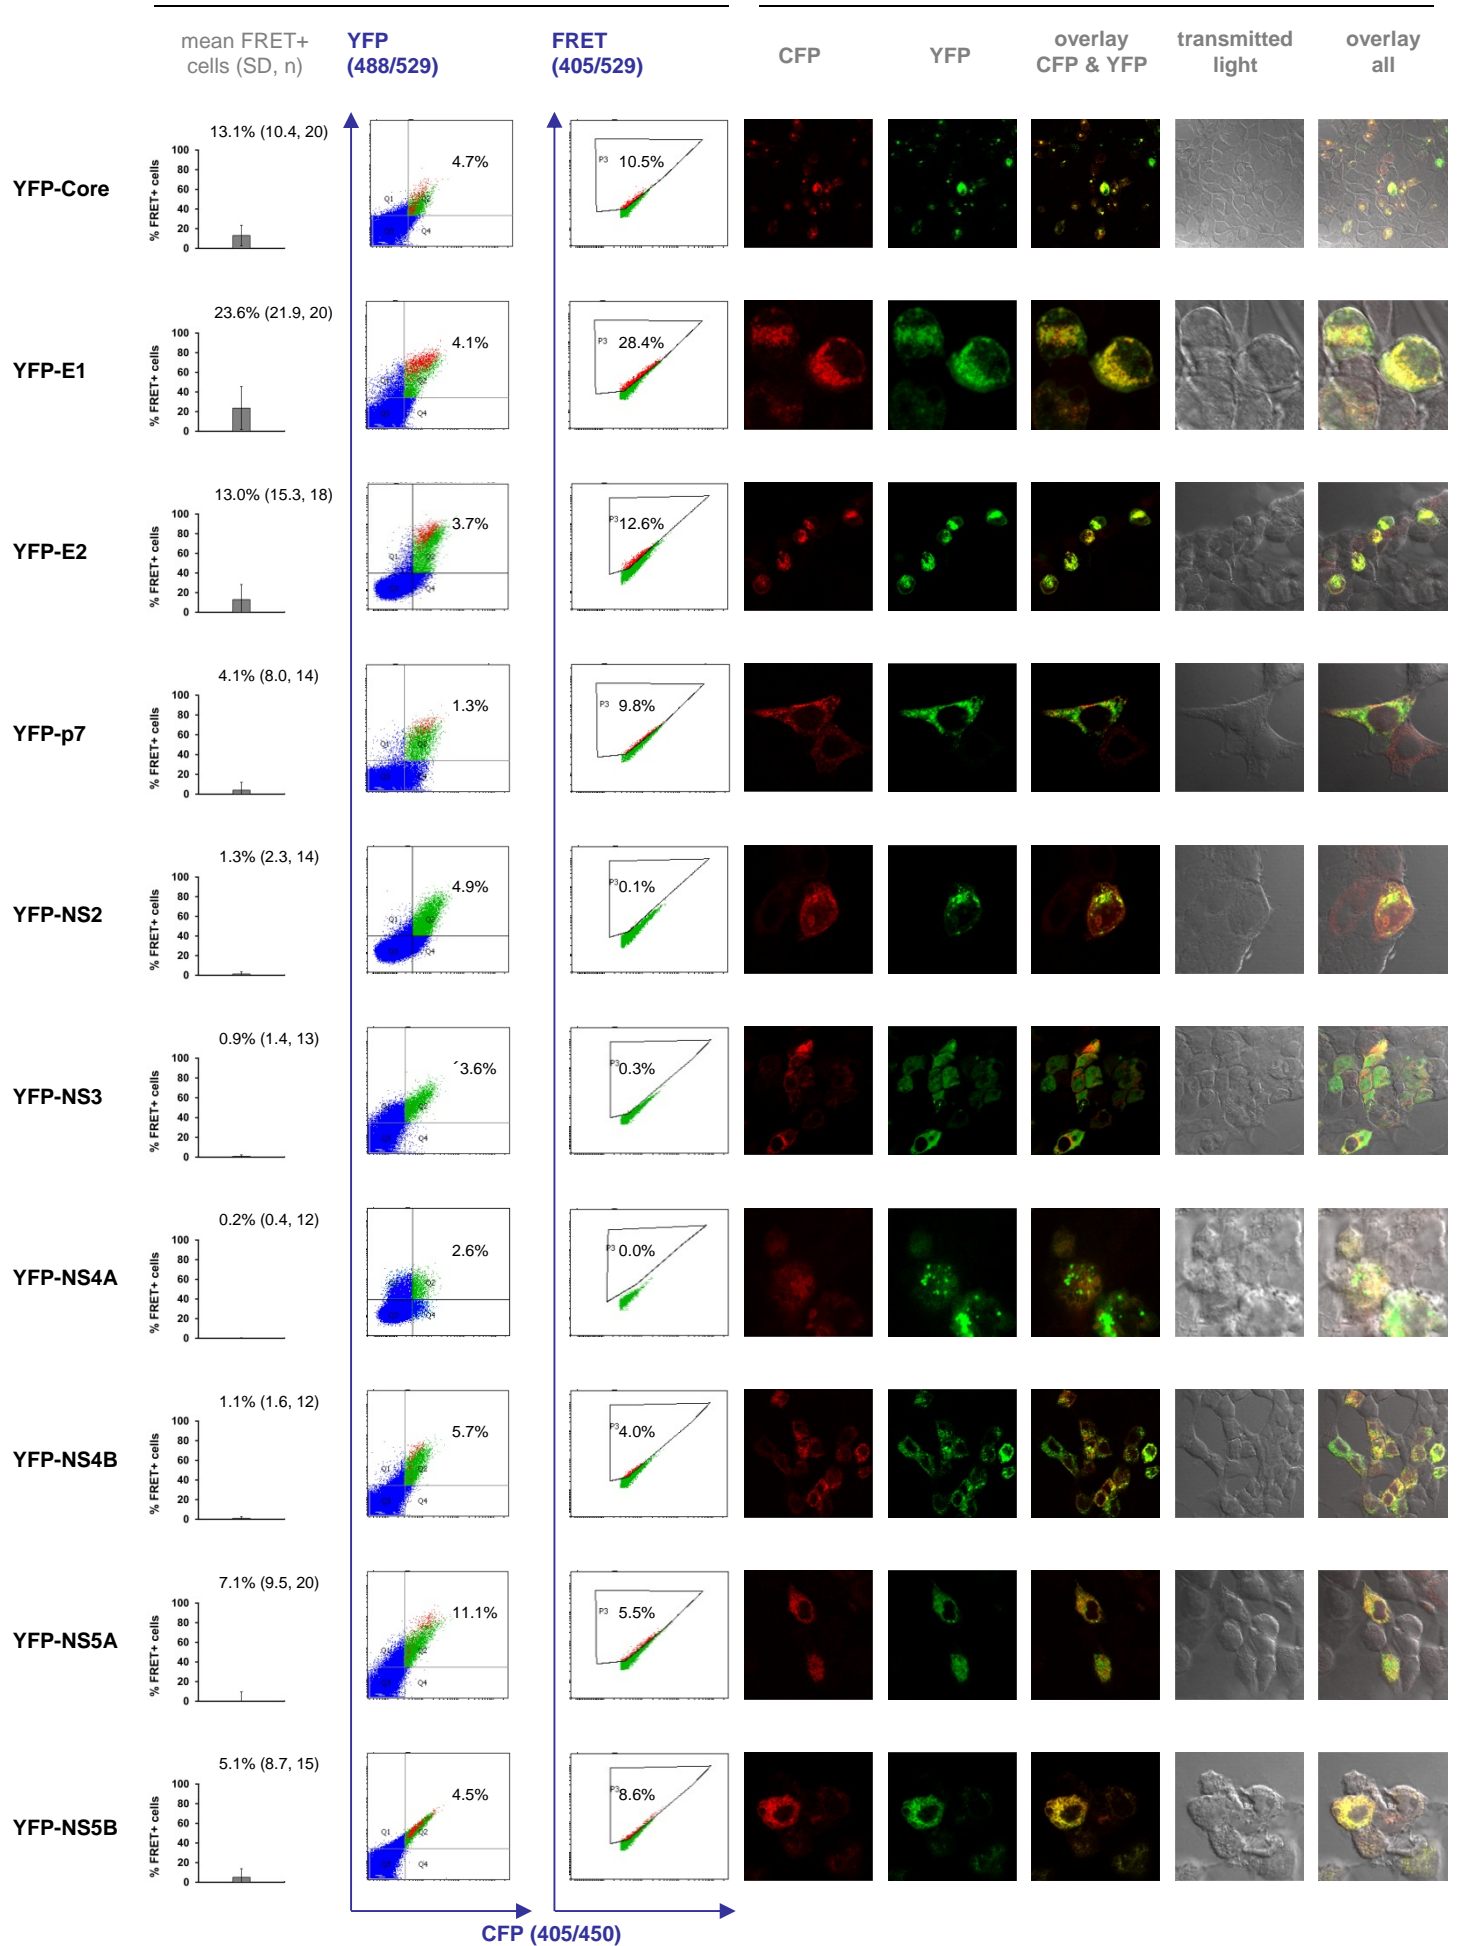

Supplement: supp_M113.036301_mcp.M113.036301-1.pdf [file supp_M113.036301_mcp.M113.036301-1.pdf]
